# Supplementary material for: Harvesting heat energy from hot/cold water with a pyroelectric generator
Source: Royal Society of Chemistry journal article supplement (doi:10.1039/c4ta01782j), 2014-01-01
Supplement: c4ta01782j6.pdf [file c4ta01782j6.pdf]

### Video information

**Video 1** The working procedure of the device when conducted manually.

**Video 2** The working setup and method of our PEG, and powering the LEDs when the temperature of the hot water is 80°C.

**Video 3** The procedure of driving LEDs when the temperature of the hot water is 60°C.

**Video 4** The procedure of driving LEDs when the temperature of the hot water is 40°C.
